# Supplementary material for: The Effects of Land-Use and Climatic Changes on the Hydrological Environment in the Qinling Mountains of Shaanxi Province
Source: MDPI journal article supplement (doi:10.3390/f13111776), 2022-10-27
Supplement: s1 [file s1]

Archive with 1 entries (1 files):
- forests-1886113-supplementary.pdf
